# Supplementary material
Source: Springer Nature journal article supplement (https://www.springermedizin.de/resource/supplementary/12963_2011_168_MOESM1_ESM.pdf/9572806)

[a]

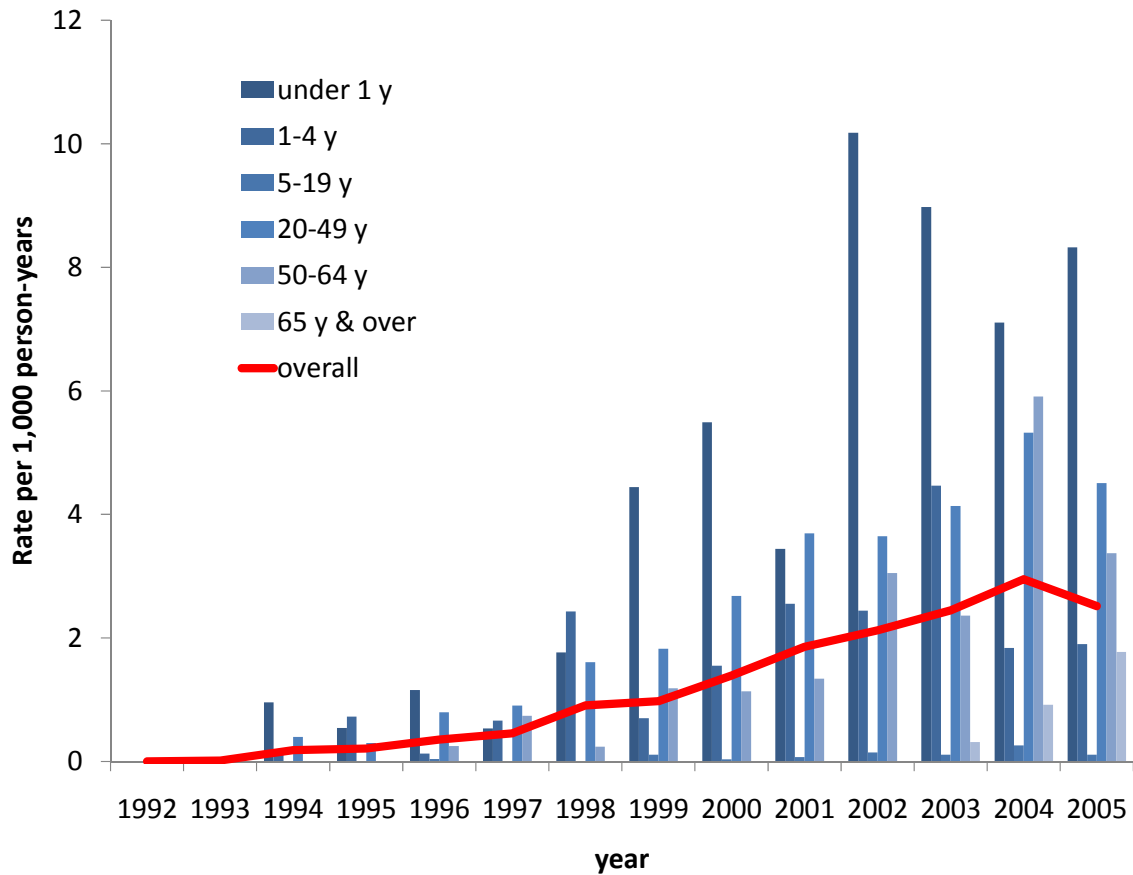

[b]

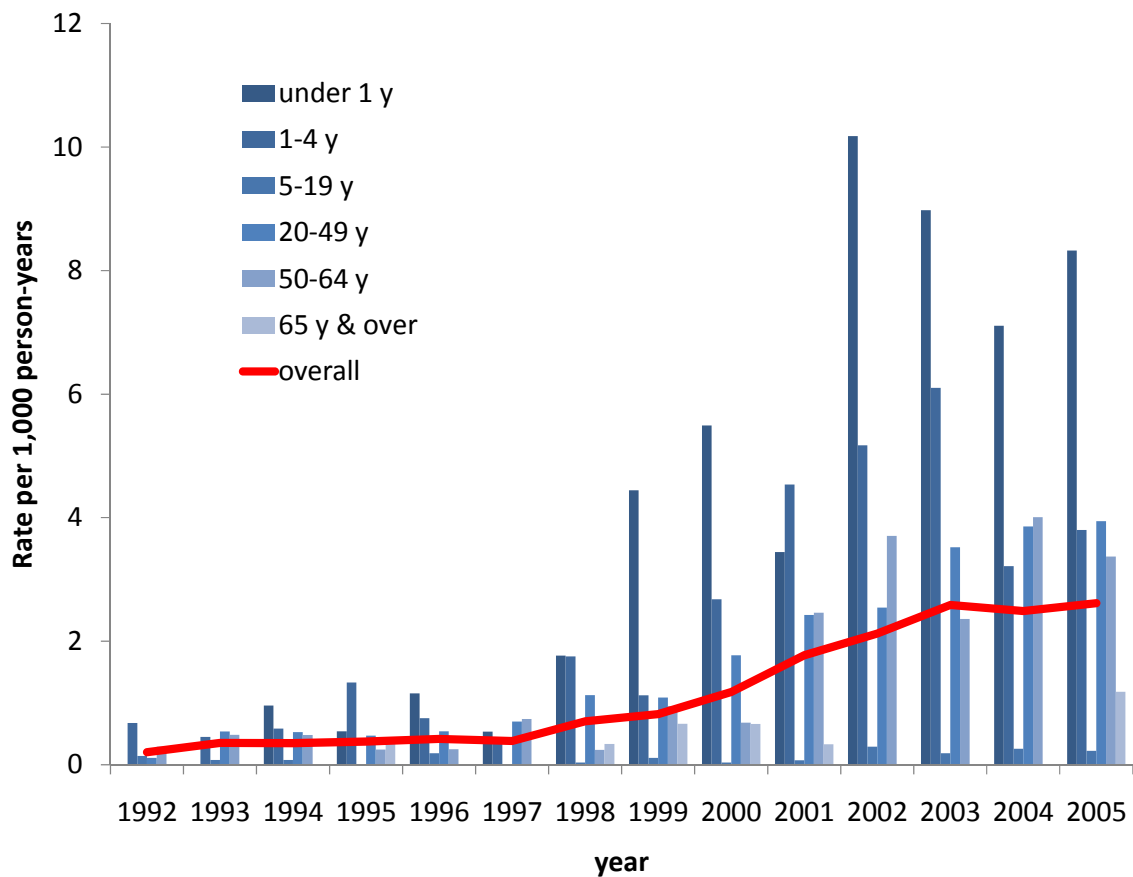

Supplement: MOESM1 [file 9572806]
